# Supplementary material
Source: MDPI journal article supplement (https://www.mdpi.com/2075-163X/8/9/384)

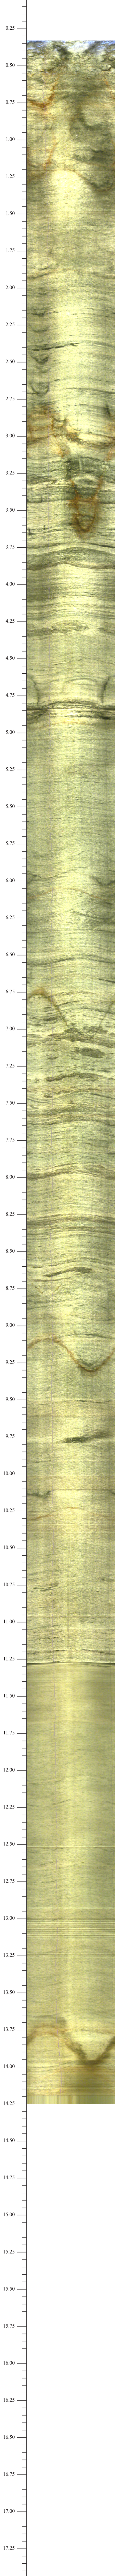

Supplement: s1 [file s1]

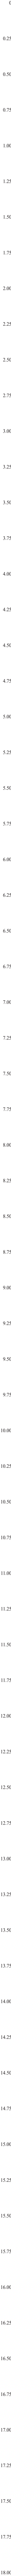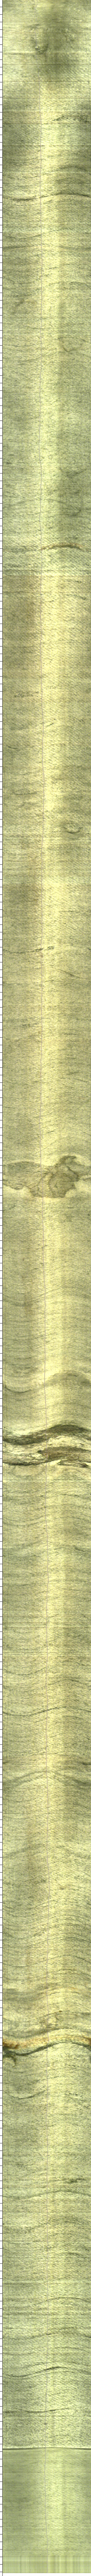

Supplement: s1 [file s1]

0  
0.25  
0.50  
0.75  
1.00  
1.25  
1.50  
1.75  
2.00  
2.25  
2.50  
2.75  
3.00  
3.25  
3.50  
3.75  
4.00  
4.25  
4.50  
4.75  
5.00  
5.25  
5.50  
5.75  
6.00  
6.25  
6.50  
6.75  
7.00  
7.25  
7.50  
7.75  
8.00  
8.25  
8.50  
8.75  
9.00  
9.25  
9.50  
9.75  
10.00  
10.25  
10.50  
10.75  
11.00  
11.25  
11.50  
11.75  
12.00  
12.25  
12.50  
12.75  
13.00  
13.25  
13.50  
13.75  
14.00  
14.25  
14.50  
14.75  
15.00  
15.25  
15.50  
15.75  
16.00  
16.25  
16.50  
16.75  
17.00  
17.25  
17.50  
17.75  
18.00

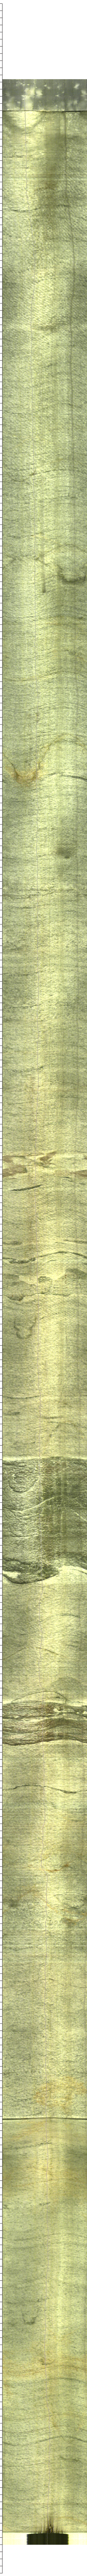

Supplement: s1 [file s1]
